# Supplementary material for: Salivary Complaints in Burning Mouth Syndrome: A Cross Sectional Study on 500 Patients
Source: MDPI journal article supplement (doi:10.3390/jcm12175561), 2023-08-26
Supplement: s1 [file s1]

**Supplementary Table S1:** Clarification for Not meeting inclusion/ exclusion criteria (*n* = 49)

| <b>Number of patients</b> | <b>Reason for exclusion</b>                                                              |
|---------------------------|------------------------------------------------------------------------------------------|
| 9                         | Type 2 diabetes                                                                          |
| 5                         | Diagnosis of hypothyroidism and initiation of replacement therapy for less than 3 months |
| 6                         | The hematological investigations showed sideropenia                                      |
| 3                         | Mildly positive ANA antibodies                                                           |
| 3                         | The patients has changed antihypertensive medication for less than 3 months              |
| 4                         | Symptoms remission after challenge-dechallenge-rechallenge test                          |
| 6                         | The patients report the onset of symptoms for less than three months                     |
| 3                         | Patients under treatment with antidepressants                                            |
| 2                         | Patients with recent diagnosis of neoplastic pathology                                   |
| 1                         | Patient with facial nerve palsy (hemiparesis)                                            |
| 5                         | Patients diagnosed with oral lichen planus                                               |
| 2                         | Patients with a previous diagnosis of Obstructive Sleep Apnea Syndrome (OSAS)            |
